# Supplementary material for: Evaluation of a quercetin–gadolinium complex as an efficient positive contrast enhancer for magnetic resonance imaging
Source: Royal Society of Chemistry journal article supplement (doi:10.1039/c5ra16405b), 2015-01-01
Supplement: c5ra16405b1.pdf [file c5ra16405b1.pdf]

## Supporting Information

### Evaluation of Quercetin-Gadolinium Complex as an Efficient Positive Contrast Enhancer for Magnetic Resonance Imaging

**Thenmozhi Muthurajan, Pooja Rammanohar, Nisha Palanisamy  
Rajendran, Swaminathan Sethuraman and Uma Maheswari Krishnan\***

*Centre for Nanotechnology & Advanced Biomaterials  
School of Chemical & Biotechnology  
SASTRA University, Thanjavur- 613 401, India*

---

\*Corresponding Author

**Prof. Uma Maheswari Krishnan Ph. D.**

Deakin Indo–Australia Chair Professor

Associate Dean for the Departments of Chemistry, Bioengineering & Pharmacy

Centre for Nanotechnology & Advanced Biomaterials (CeNTAB)

School of Chemical & Biotechnology

SASTRA University, Thanjavur – 613 401

TamilNadu,

India

Ph.: (+91) 4362 264101 Ext: 3677

Fax: (+91) 4362 264120

E–mail: [umakrishnan@sastra.edu](mailto:umakrishnan@sastra.edu)

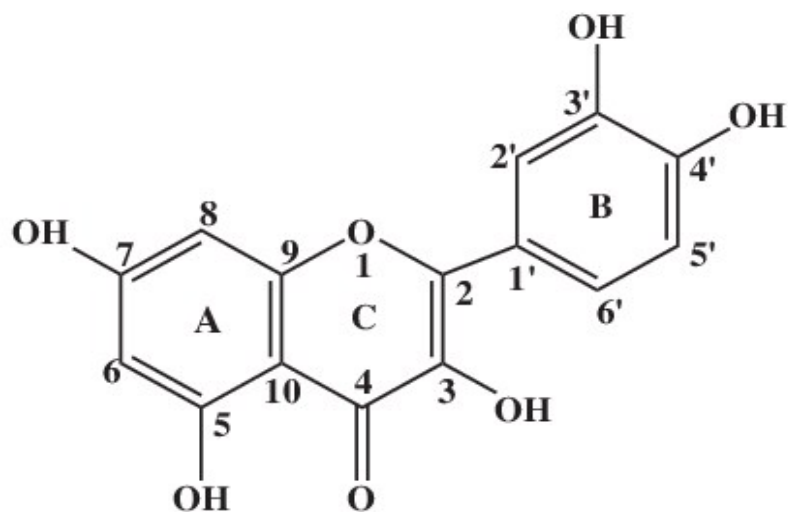

Figure S1. The structure of quercetin

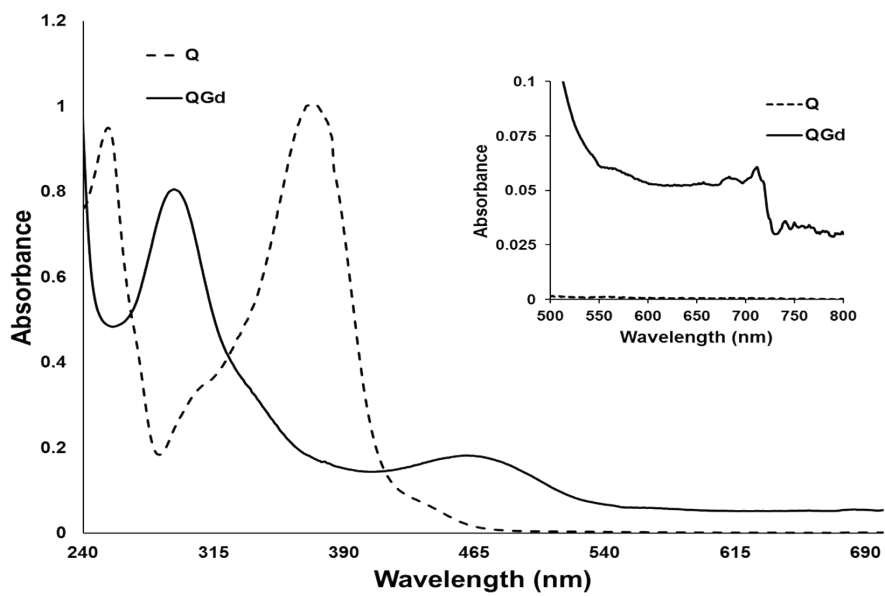

Figure S2A. UV-Visible spectra of Q and QGd complex

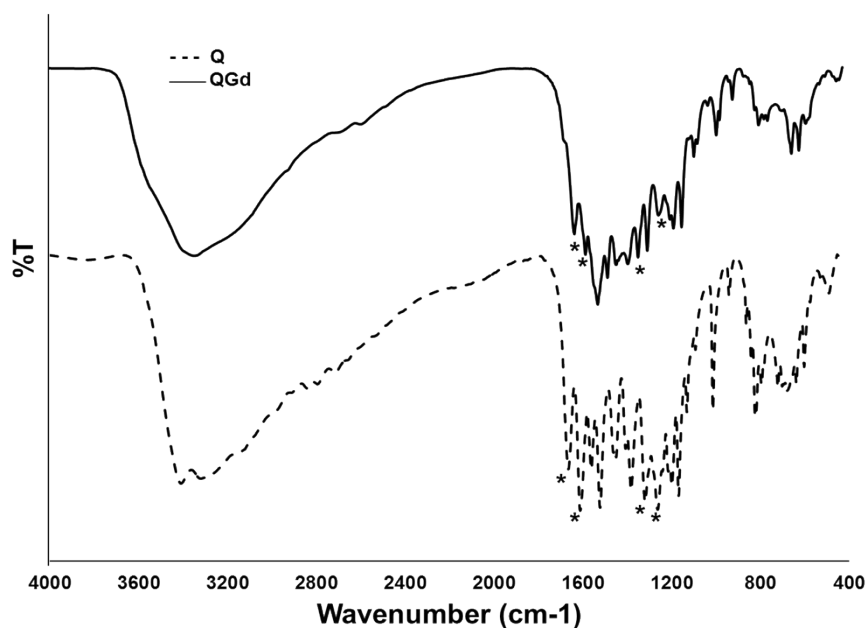

**Figure S2B. FTIR spectrum of quercetin and quercetin-gadolinium complex. Asterisk (\*) symbol denotes the wavenumbers corresponding the band shift in Q and QGd complex.**

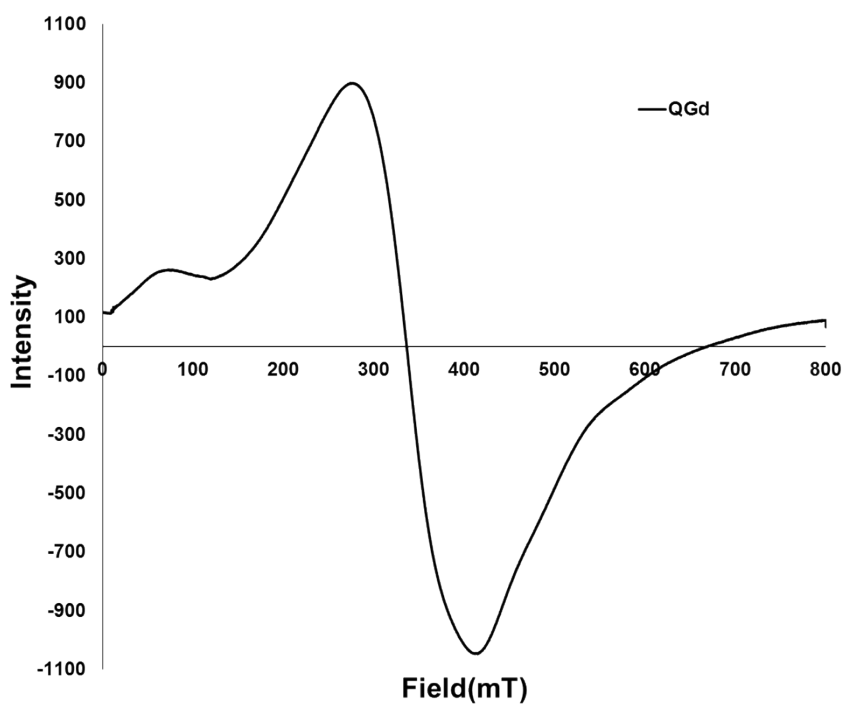

**Figure S3. EPR spectrum of quercetin-gadolinium complex**

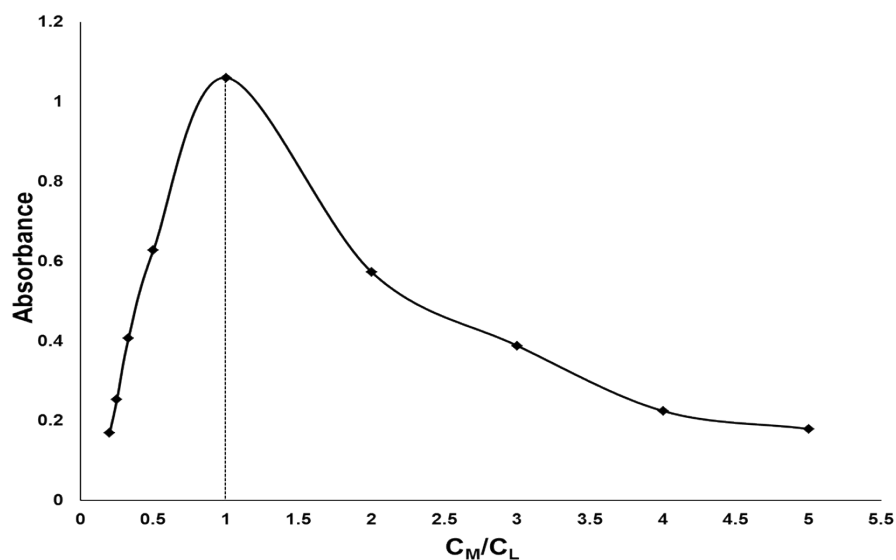

**Figure S4A.** The Mole-ratio plot for interaction of quercetin with gadolinium(III). The dotted line shows the 1:1 stoichiometry for QGd complex

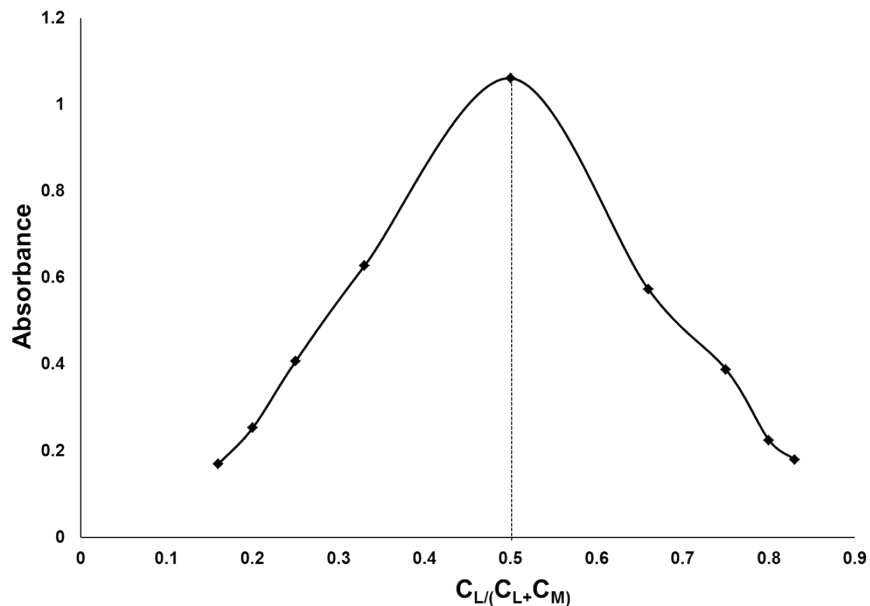

**Figure S4B.** Job's plot for quercetin and gadolinium(III) from UV spectra varying the proportion of  $[\text{quercetin} + \text{gadolinium(III)}] = 1 \times 10^{-2} \text{ mol L}^{-1}$  (constant for all measures) in DMSO. The dotted line shows 1:1 stoichiometry for QGd complex.

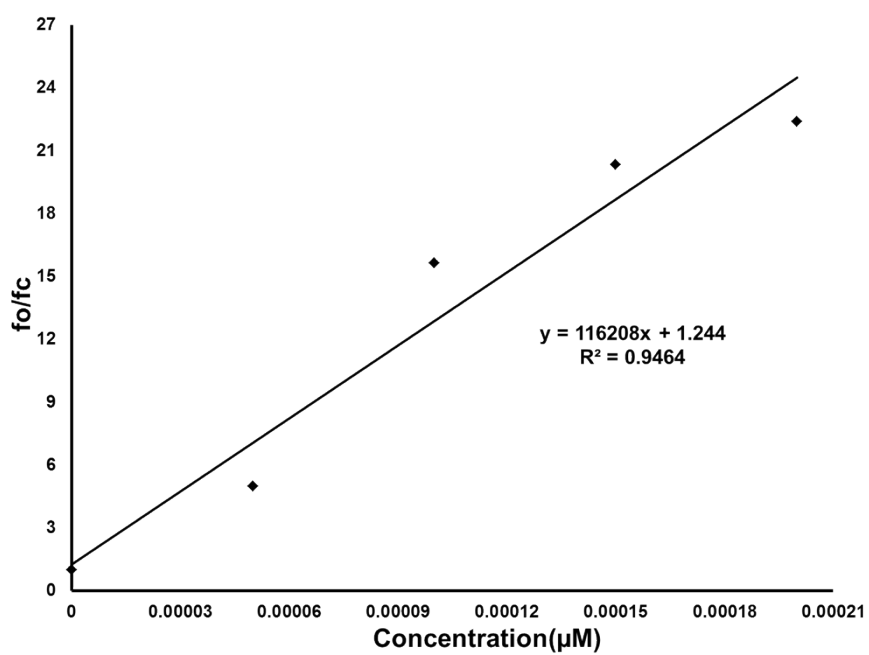

Figure S5. Stern-Volmer plot for quercetin-gadolinium(III) complex
